# Supplementary material for: Treatment Patterns and Survival in Patients with Intermediate, Advanced, or Terminal Stage of Hepatocellular Carcinoma in France over the Period 2015-2017: A Real-Life Study
Source: Hindawi journal article supplement (doi:10.1155/2023/5800168), 2023-02-22
Supplement: f1 [file 5800168.f1.docx]

**Supplementary materials**

**Supplementary Figure S1**: Inclusion and follow-up period

**Supplementary Table S1:** Procedure codes used to identify curative treatments

**Supplementary Table S2:** Procedure codes used to identify chemo and radio-embolization

**Supplementary Table S3:** Codes used to identify HCC systemic treatments

**Supplementary Table S4**: ICD-10 diagnosis and ATC codes used to identify HCC aetiologies investigated: causes of chronic liver diseases and diabetes mellitus

**Supplementary Figure S2**: Algorithm used to classify and rank HCC aetiologies

**Supplementary Table S5**: Distribution of aetiologies (one aetiology per patient) in the incident intermediate, advanced or terminal stage HCC population (N= 19,649)

**Supplementary Figure S1: Inclusion and follow-up period**

2013

2014

2015

2016

2017

**Pre- inclusionperiod to select incident cases**

**Inclusionand follow-up period**

31/12/2017

01/01/2013

**index date: first HCC record over 2015-0217 in patients alive at 01/01/2015 in absence of any previous Intermediate/advanced or terminal HCC record within a 2-year period**

**Supplementary Table S1: Procedure codes used to identify curative treatments**

| **Procedures title** | **CCAM codes** |
| --- | --- |
| LIVER TRANSPLANTATION |  |
| Total liver transplantation | HLEA001 |
| Reduced liver transplantation | HLEA002 |
| HEPATECTOMY (surgical resection) |  |
| Atypical coelioscopic liver resection | HLFC003 |
| Atypical laparoscopic liver resection | HLFA019 |
| Liver cœlioscopic uni segmentectomy | HLFC004 |
| Liver laparoscopic uni- segmentectomy | HLFA020 |
| Liver laparoscopic Resection of spigelian lobe | HLFA003 |
| Liver cœlioscopic bi-segmentectomy | HLFC027 |
| Liver laparoscopic bi-segmentectomy | HLFA009 |
| Liver cœlioscopic tri segmentectomy | HLFC032 |
| Liver laparoscopic tri-segmentectomy | HLFA006 |
| Cœlioscopic left Hepatectomy | HLFC002 |
| Laparoscopic left Hepatectomy | HLFA011 |
| Laparoscopic left Hepatectomy including Spigelian lobe | HLFC037 |
| Laparoscopic right Hepatectomy | HLFA018 |
| Laparoscopic right Hepatectomy including Spigelian lobe | HLFA007 |
| Laparoscopic right Lobectomy droite including Spigelian lobe | HLFA017 |
| Laparoscopic right central Hepatectomy | HLFA004 |
| RADIOFREQUENCY ABLATION (RFA) |  |
| Hepatic tumour destruction by ultrasound-guided percutaneous radiofrequency | HLNM001 |
| Hepatic tumour destruction by CT-guided percutaneous radiofrequency | HLNK001 |
| Hepatic tumour destruction by MRI-guided percutaneous radiofrequency | HLNN900 |
| Hepatic tumour destruction by laparoscopic radiofrequency | HLNC003 |
| Hepatic tumour destruction by laparotomic radiofrequency | HLNA007 |

CCAM: Common Classification System of Medical Procedures

**Supplementary Table S2: Procedure codes used to identify chemo and radio-embolization**

| **Procedure titles** | **CCAM codes** |
| --- | --- |
| CHIMIO-EMBOLIZATION (TACE) |  |
| Selective or hyperselective in situ hepatic intraarterial injection of a non-radioisotopic cancer pharmacological agent without particle embolization, by transcutaneous arterial route | EDLF014 |
| Supraselective hepatic intraarterial in situ supraselective injection of non-radioisotopic cancer pharmacological agent without particle embolization, by transcutaneous arterial route | EDLF015 |
| Hepatic intraarterial in situ supraselective injection of non-radioisotopic anti-cancer pharmacological agent with particle embolization, by transcutaneous arterial route | EDLF016 |
| Selective or hyper-selective in situ hepatic intra-arterial injection of non-radioisotopic cancer pharmacological agent with particle embolization, by transcutaneous arterial route | EDLF017 |
| RADIO-EMBOLIZATION (TARE) |  |
| In situ hepatic intra-arterial injection of radioisotopic pharmacological agent without particle embolization, by transcutaneous arterial route | EDLL002 |
| In situ hepatic intra-arterial injection of radioisotopic pharmacological agent with particle embolization, by transcutaneous arterial route | EDLL001 |

CCAM: Common Classification System of Medical Procedures

**Supplementary Table S3: Codes used to identify HCC systemic treatments**

| **Drug (active ingredient)** | **ATC Code** |
| --- | --- |
| Sorafenib | L01XE05 |
|
| Lenvatinib | L01XE29 |
|
| Regorafenib | L01XE21 |
|
| Cabozantinib | L01XE26 |
| **Chemotherapy session for oncology drug** | **ICD-10 codes** |
|
| Chemotherapy session in oncology associated with hepatocellular carcinoma | Z511 in association with C220 |
|

ATC: Anatomic Therapeutic Chemical coding system; ICD-10: International Classification of Diseases, Tenth Revision

**Supplementary Table S4: ICD-10 diagnosis and ATC codes used to identify HCC aetiologies investigated: causes of chronic liver diseases and diabetes mellitus**

| **CHRONIC LIVER DISEASES** |  |
| --- | --- |
| **Diagnosis** | **ICD-10 code** |
| ALCOHOLIC LIVER DISEASE | K70, K71 |
| VIRAL AETIOLOGY |  |
| Chronic viral hepatitis B with delta-agent | B180 |
| Chronic viral hepatitis B | B181 |
| Carrier of viral hepatitis | Z225 |
| Chronic viral hepatitis C | B182 |
| Other chronic viral hepatitis | B188 |
| Chronic viral hepatitis, unspecified | B189 |
| Unspecified viral hepatitis with hepatic coma | B190 |
| Unspecified viral hepatitis without hepatic coma | B199 |
| NASH/NAFLD |  |
| Other specified inflammatory liver (NASH) | K758 |
| Fatty (change of) liver, not elsewhere classified (NAFLD) | K760 |
| OTHER |  |
| Hepatic failure, not elsewhere classified | K72 |
| Chronic hepatitis, not elsewhere classified | K73 |
| Fibrosis and cirrhosis of liver | K74 |
| Nonspecific reactive hepatitis | K752 |
| Granulomatous hepatitis, not elsewhere classified | K753 |
| Autoimmune hepatitis | K754 |
| Inflammatory liver disease, unspecified | K759 |
| Hemochromatosis | E8311 |
| **DIABETES MELLITUS** |  |
| **Diagnosis** | **ICD-10 codes** |
| Type 1 diabetes mellitus | E10 |
| Type 2 diabetes mellitus | E11 |
| Malnutrition-related diabetes mellitus | E12 |
| Other specified diabetes mellitus | E13 |
| Unspecified diabetes mellitus | E14 |
| **Drugs** | **ATC codes** |
| INSULIN and ANALOG | A10AB01, A10AB03, A10AB04, A10AB05, A10AB06, A10AC01, A10AC03, A10AC04, A10AD01, A10AD03, A10AD04, A10AD05, A10AE01, A10AE02, A10AE03, A10AE04, A10AE05, A10AE30, A10BA02 |
| BLOOD GLUCOSE LOWERING DRUGS, EXCL. INSULINS | A10BB01, A10BB03, A10BB04, A10BB06, A10BB07, A10BB09, A10BB12, A10BD02, A10BD03, A10BD05, A10BD07, A10BD08, A10BD10, A10BD15, A10BD16, A10BF01, A10BF02, A10BG02, A10BG03, A10BH01, A10BH02, A10BH03, A10BX02, A10BX04, A10BX07, A10BX09, A10BX10, A10BX11, A10BX12 |

ICD-10: International Classification of Diseases, Tenth Revision

ATC codes: Anatomic Therapeutic Chemical coding system

**Supplementary Figure S2: Algorithm used to classify and rank HCC aetiologies.**

**
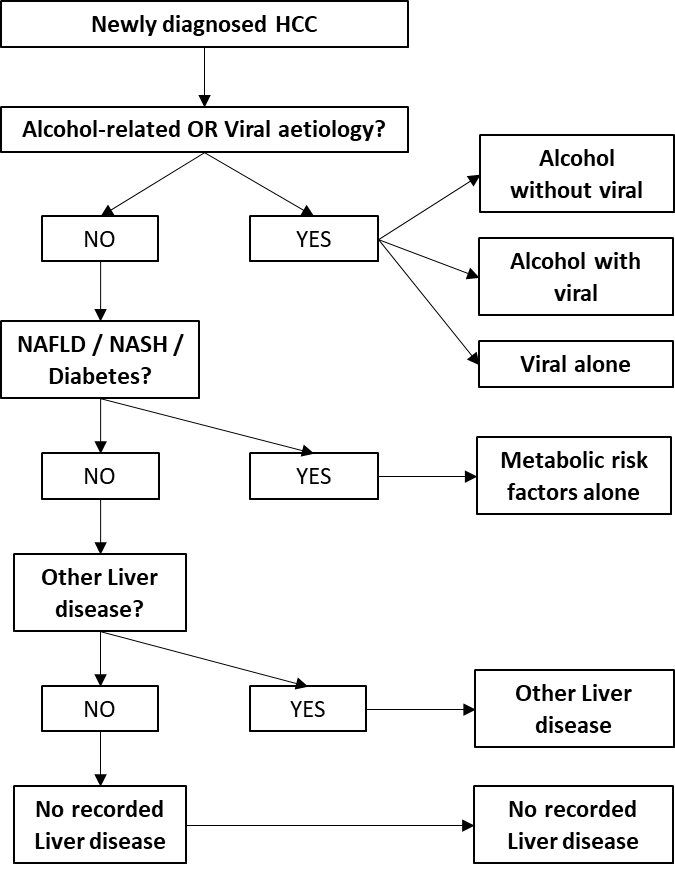
**

NAFLD (non-alcoholic fatty liver disease); NASH (non-alcoholic steatohepatitis); diabetes mellitus

**Supplementary Table S5: Distribution of aetiologies (one aetiology per patient**†**) in the incident intermediate, advanced or terminal stage HCC population (N= 19,649)**

| **Aetiologies** | **N (percentage)** |
| --- | --- |
| Alcohol-related liver disease without viral hepatitis‡ | 8,897 (45.3%) |
| Viral hepatitis related liver disease without alcohol‡ | 2,204 (11.2%) |
| Alcohol and Viral hepatitis related liver disease‡ | 1,431 (7.3%) |
| Metabolic risk factors alone§ | 3,331 (17.0%) |
| Other Liver disease | 1,190 (6.1%) |
| No recorded Liver disease | 2,596 (13.2%) |
| Total | 19,649 (100%) |

†See Figure S2; ‡With or without metabolic risk factors: NAFLD (non-alcoholic fatty liver disease); NASH (non-alcoholic steatohepatitis) or diabetes mellitus; §In absence of alcohol or viral aetiologies
